# Supplementary material for: Sulfur encapsulated in thermally reduced graphite oxide as a cathode for Li–S batteries
Source: Royal Society of Chemistry journal article supplement (doi:10.1039/c7ra12694h), 2018-01-01
Supplement: c7ra12694h1.pdf [file c7ra12694h1.pdf]

## Support Information

### Sulfur encapsulated in thermal reduced graphite oxide as cathode for Li-S battery

Xinbo Xu<sup>a</sup>, Jiafeng Ruan<sup>a</sup>, Yuepeng Pang<sup>a,b</sup>, Tao Yuan<sup>a,b</sup>, Shiyong Zheng<sup>a,b\*</sup>

<sup>a</sup> School of Materials Science and Engineering, University of Shanghai for Science and Technology, Shanghai 200093, China

<sup>b</sup> Shanghai Innovation Institute for Materials, Shanghai 200444, China

\* Corresponding author: syzheng@usst.edu.cn

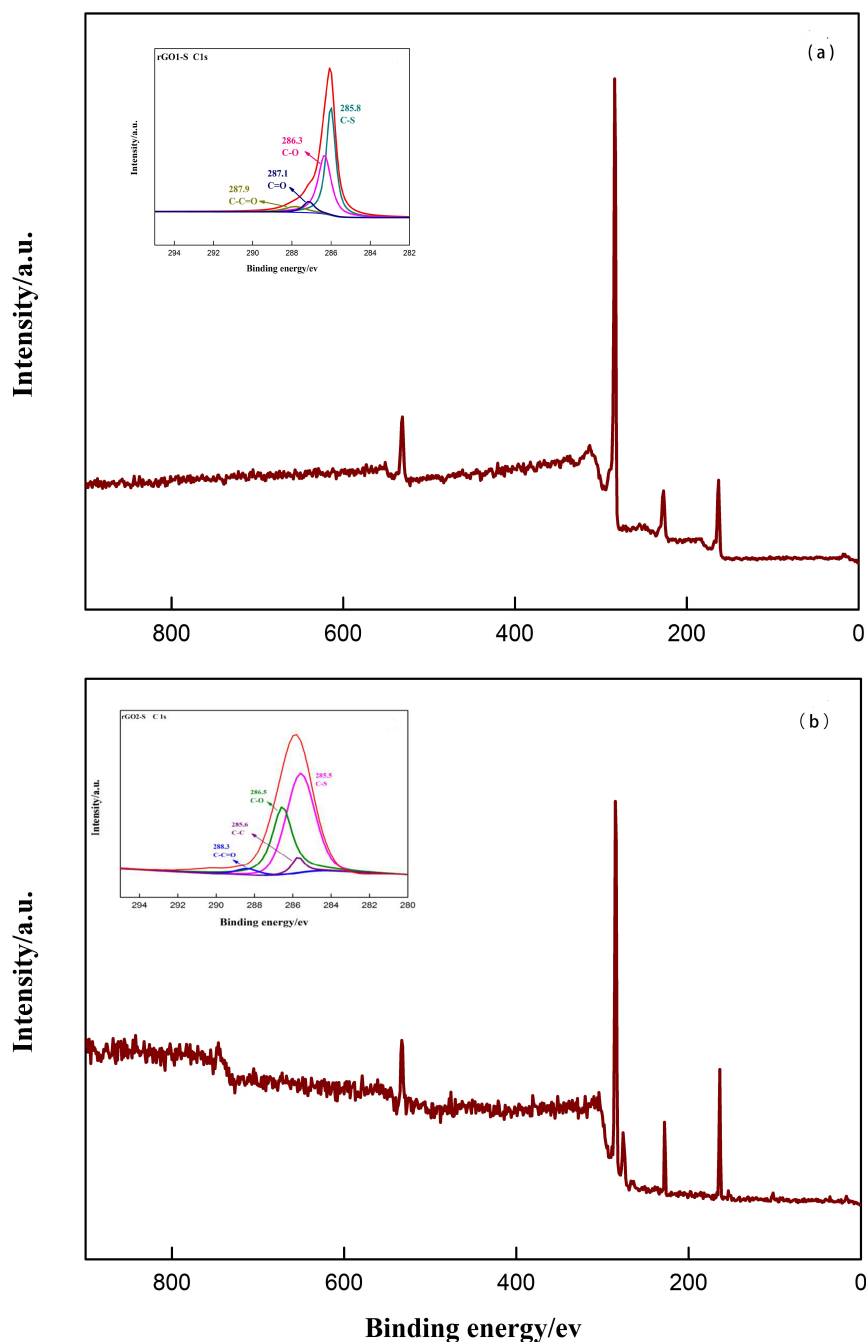

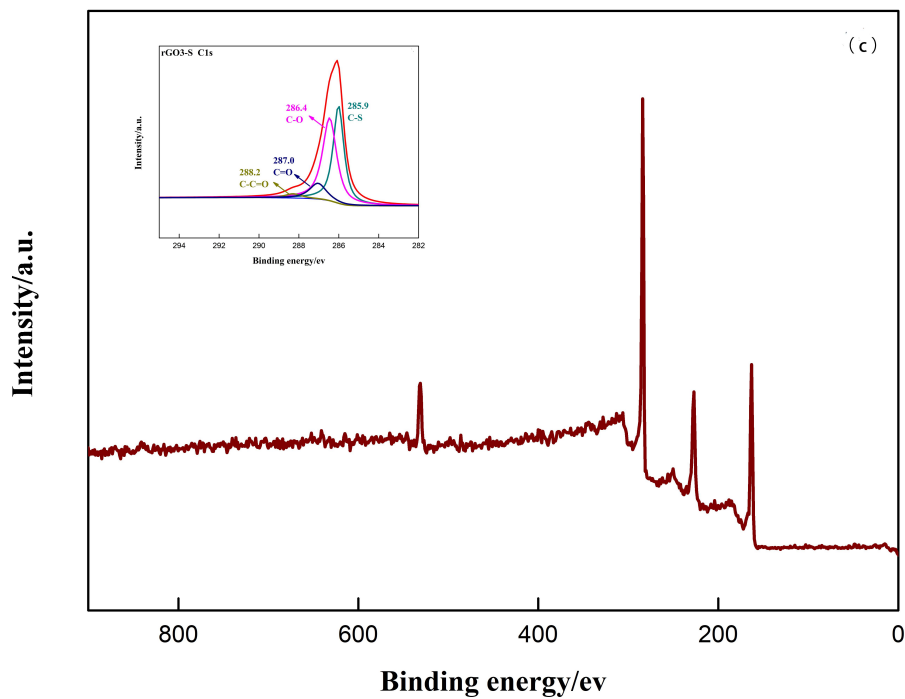

Fig.S1 XPS spectra of rGO/S composites, with the inset showing the magnified C 1s spectrum: (a) rGO1-S, (b) rGO2-S, and (c) rGO3-S.

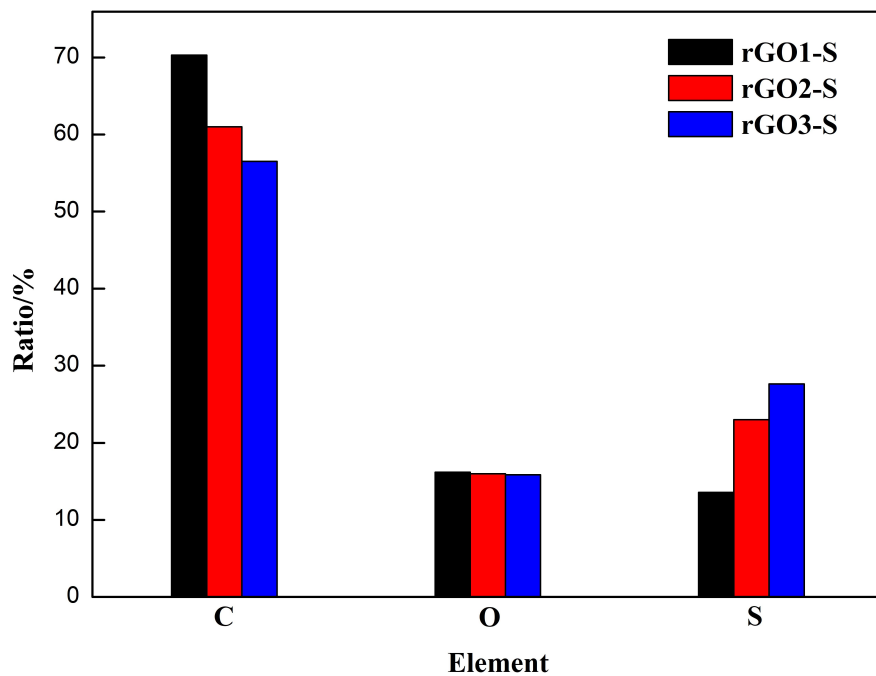

Fig. S2 Element ratio of C,O,S in rGO1-S, rGO2-S, rGO3-S
